# Supplementary material
Source: bioRxiv or medRxiv preprint supplement (https://www.biorxiv.org/highwire/filestream/111239/field_highwire_adjunct_files/0/365866-1.pdf)
Supplement: Supplementary file [file 365866-1.pdf]

## **Supplemental Materials – Table of Contents**

### **Supplementary Figures**

Supplemental Figure S1: FACS plots synchronization plus dapi stained microscopy images

Supplemental Figure S2: Full 5C heatmap of non-synchronized cells, mitotic cells and mitotic chromatin

Supplemental Figure S3 ATAC V-plots CTCF with ENCODE ChIP, CTCF distal vs proximal and CTCF with mitotic cell peak

Supplemental Figure S4 Clustering of 75-150 bp length bin

Supplemental Figure S5 BedGraph tracks and length distribution of HeLa-S3, HFF and U2OS

Supplemental Figure S6 V-plots of CTCF sites of HeLa-S3, HFF and U2OS

Supplemental Figure S7 ATAC V-plots and length distribution all TSS

Supplemental Figure S8 CUT&RUN CTCF timecourse MNase

Supplemental Figure S9 CUT&RUN signal on ENCODE ChIP CTCF, on all CTCF motifs, on proximal and distal CTCF sites.

Supplemental Figure S10 CUT&RUN aggregate heatmaps

Supplemental Figure S11 Peak calling on CUT&RUN data deepseq table

Supplemental Figure S12 Western blots CTCF antibodies on NS/M Cell/M Cluster

Supplemental Figure S13 CUT&RUN H2A.Z and K4Me3 on TSS

Supplemental Figure S14 Bedgraph, length distribution and V-plots of fresh and frozen mitotic clusters

Supplemental Figure S15 ATAC V-plot normalized vs unnormalized

### **Supplementary Tables**

Table 1 – 5C mapping statistics

Table 2 – Antibodies used for western blot and C&R

### **Supplementary Movies**

Movie S1 – Live cell imaging halo-CTCF overlaid with brightfield

Movie S2 – Live cell imaging H2B-GFP on left and halo-CTCF on right

Movie S3 – Single particle tracking Halo-CTCF in interphase cells

Movie S4 - Single particle tracking Halo-CTCF in nocodazole arrested mitotic cells

Movie S5 - Single particle tracking Halo-CTCF in “enriched” prometaphase cells

Supplemental Fig. S1

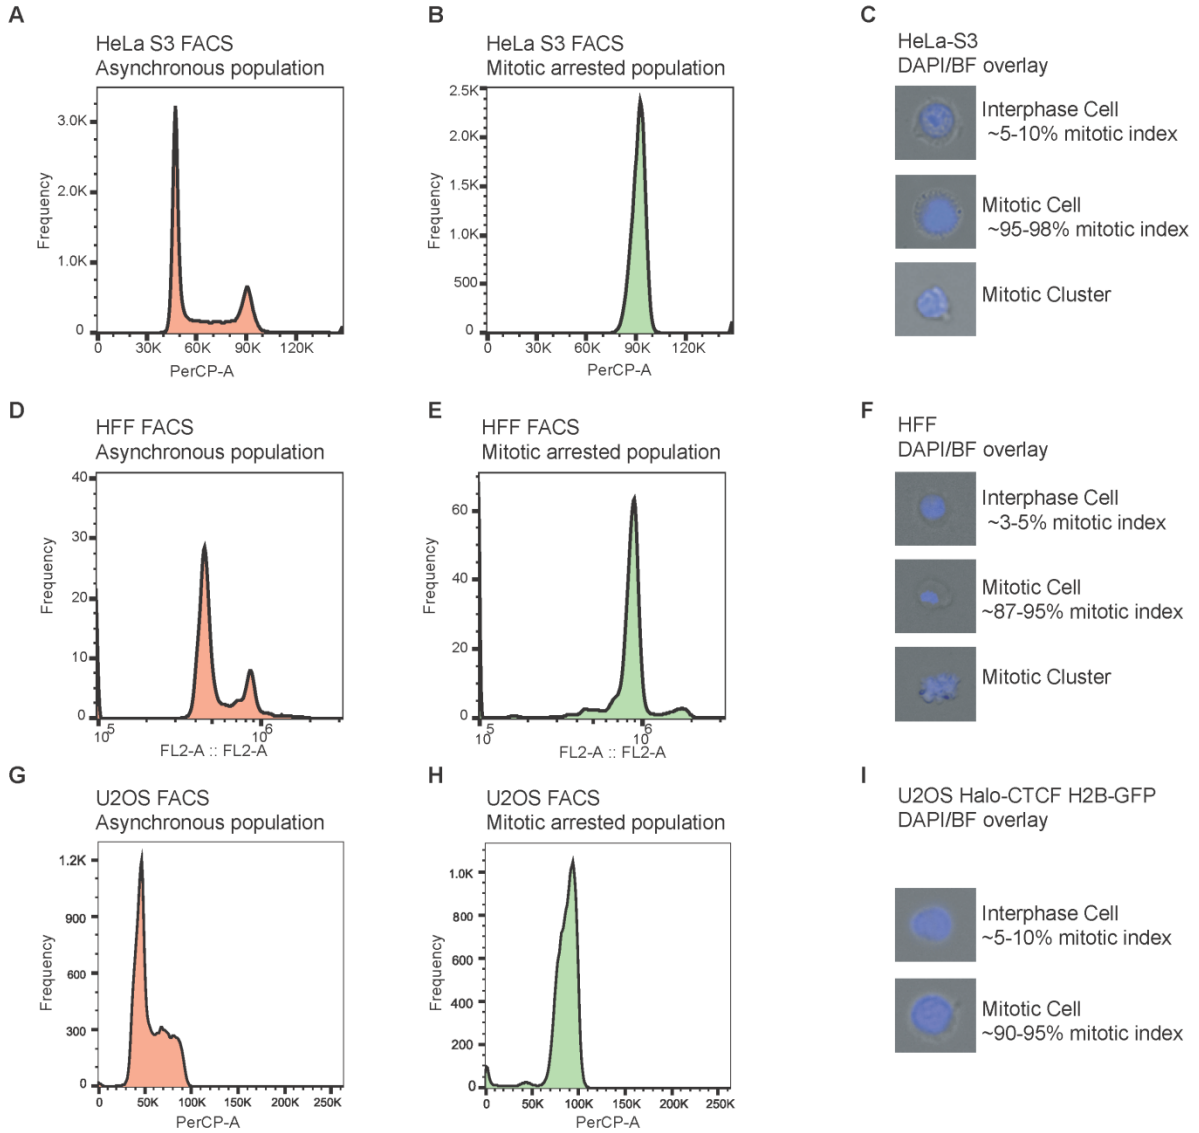

**Supplemental Fig. S1** – Flow cytometry using propidium iodide staining and microscopy using DAPI staining show synchronization in M-phase by Nocodazole. **(A-B)** Cell cycle flow cytometry for non-synchronized **(A)** and nocodazole arrested **(B)** HeLa-S3 cell populations. **(C)** DAPI staining of an interphase cell, nocodazole arrested prometaphase cell and purified mitotic chromatin of HeLa-S3 cells and their average scored mitotic index in percentage of total population. **(D-E)** Cell cycle flow cytometry for non-synchronized **(D)** and nocodazole arrested **(E)** HFF cell populations. **(F)** DAPI staining of an interphase cell, nocodazole arrested

prometaphase cell and purified mitotic chromatin of HFF and their average scored mitotic index in percentage of total population. (**G-H**) Cell cycle flow cytometry for non-synchronized (**G**) and nocodazole arrested (**H**) U2OS Halo-CTCF H2B –GFP cell populations. (**I**) DAPI staining of an interphase cell and nocodazole arrested prometaphase cell of U2OS Halo-CTCF H2B-GFP and their average scored mitotic index in percentage of total population. Note that the scales of x-axes of the different plots are different dependent on the setting of the FACS equipment.

Supplemental Fig. S2

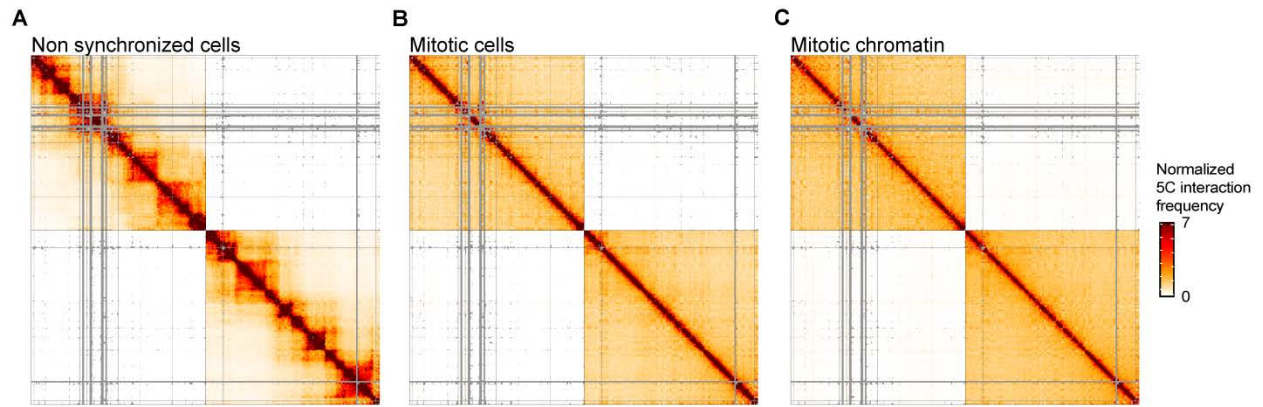

**Supplemental Fig. S2** – 5C interaction interaction maps obtained with non-synchronized HeLa-S3 cells (**A**), mitotic HeLa-S3 cells (**B**), and mitotic chromatin purified from mitotic HeLa-S3 cells (**C**). Heatmap shows two 2 MB regions located on chromosome 1 (hg19 chr1: 46740122-48740121 (upper left)) and chromosome 11 (hg19 chr11: 33003550-35003549 (lower right)). Data was binned in 20 kb bins.

Supplemental Fig. S3

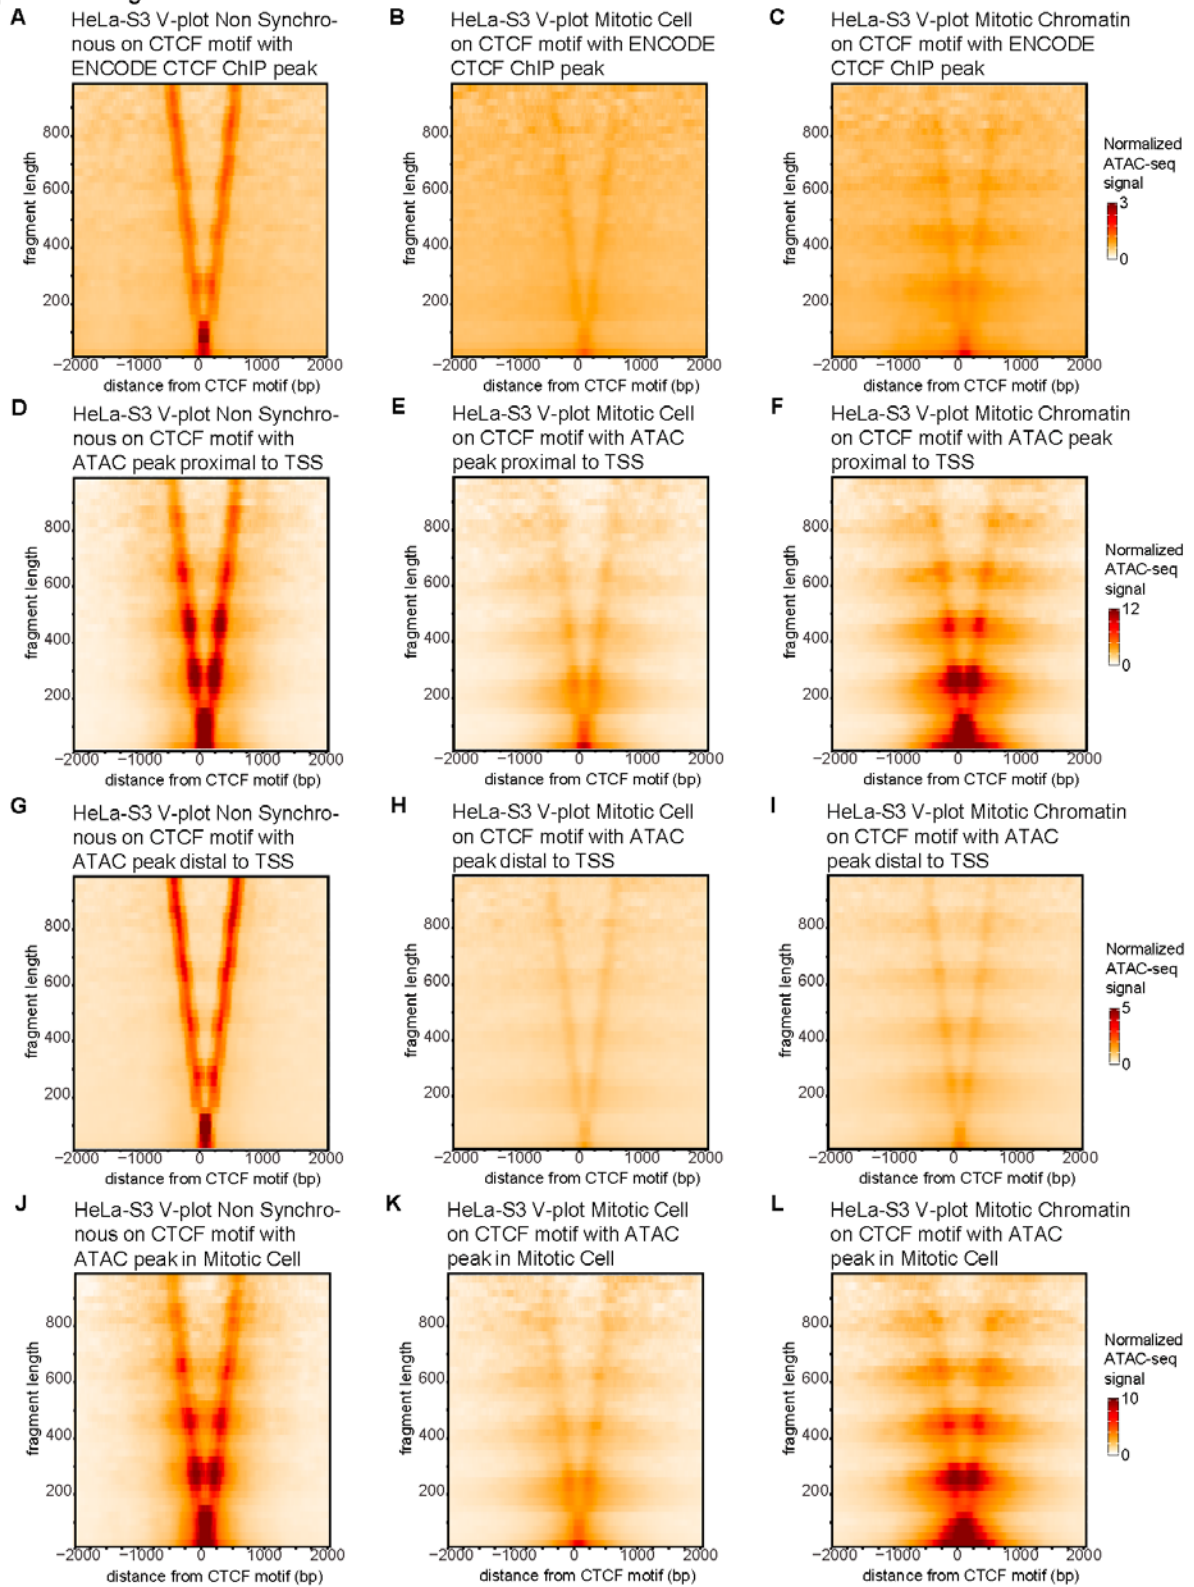

**Supplemental Fig. S3** – **(A-C)** Normalized V-plots at CTCF motifs that display ENCODE CTCF ChIP peaks. V-plots are made based on ATAC-seq data from non-synchronized cells **(A)**, mitotic cells **(B)** and mitotic chromatin **(C)**. **(D-F)** Normalized V-plots at CTCF motifs within 2kb of TSS in non-synchronized cells **(D)**, mitotic cells **(E)** and mitotic chromatin **(F)**. **(G-I)** Normalized V-plots at CTCF motifs 2 kb or more away from any TSS in non-synchronized cells **(G)**, mitotic cells **(H)** and mitotic chromatin **(I)**. **(J-L)** Normalized V-plots at CTCF motifs with mitotic ATAC-seq peak in non-synchronized cells **(J)**, mitotic cells **(K)** and mitotic chromatin **(L)**.

Supplemental Fig. S4

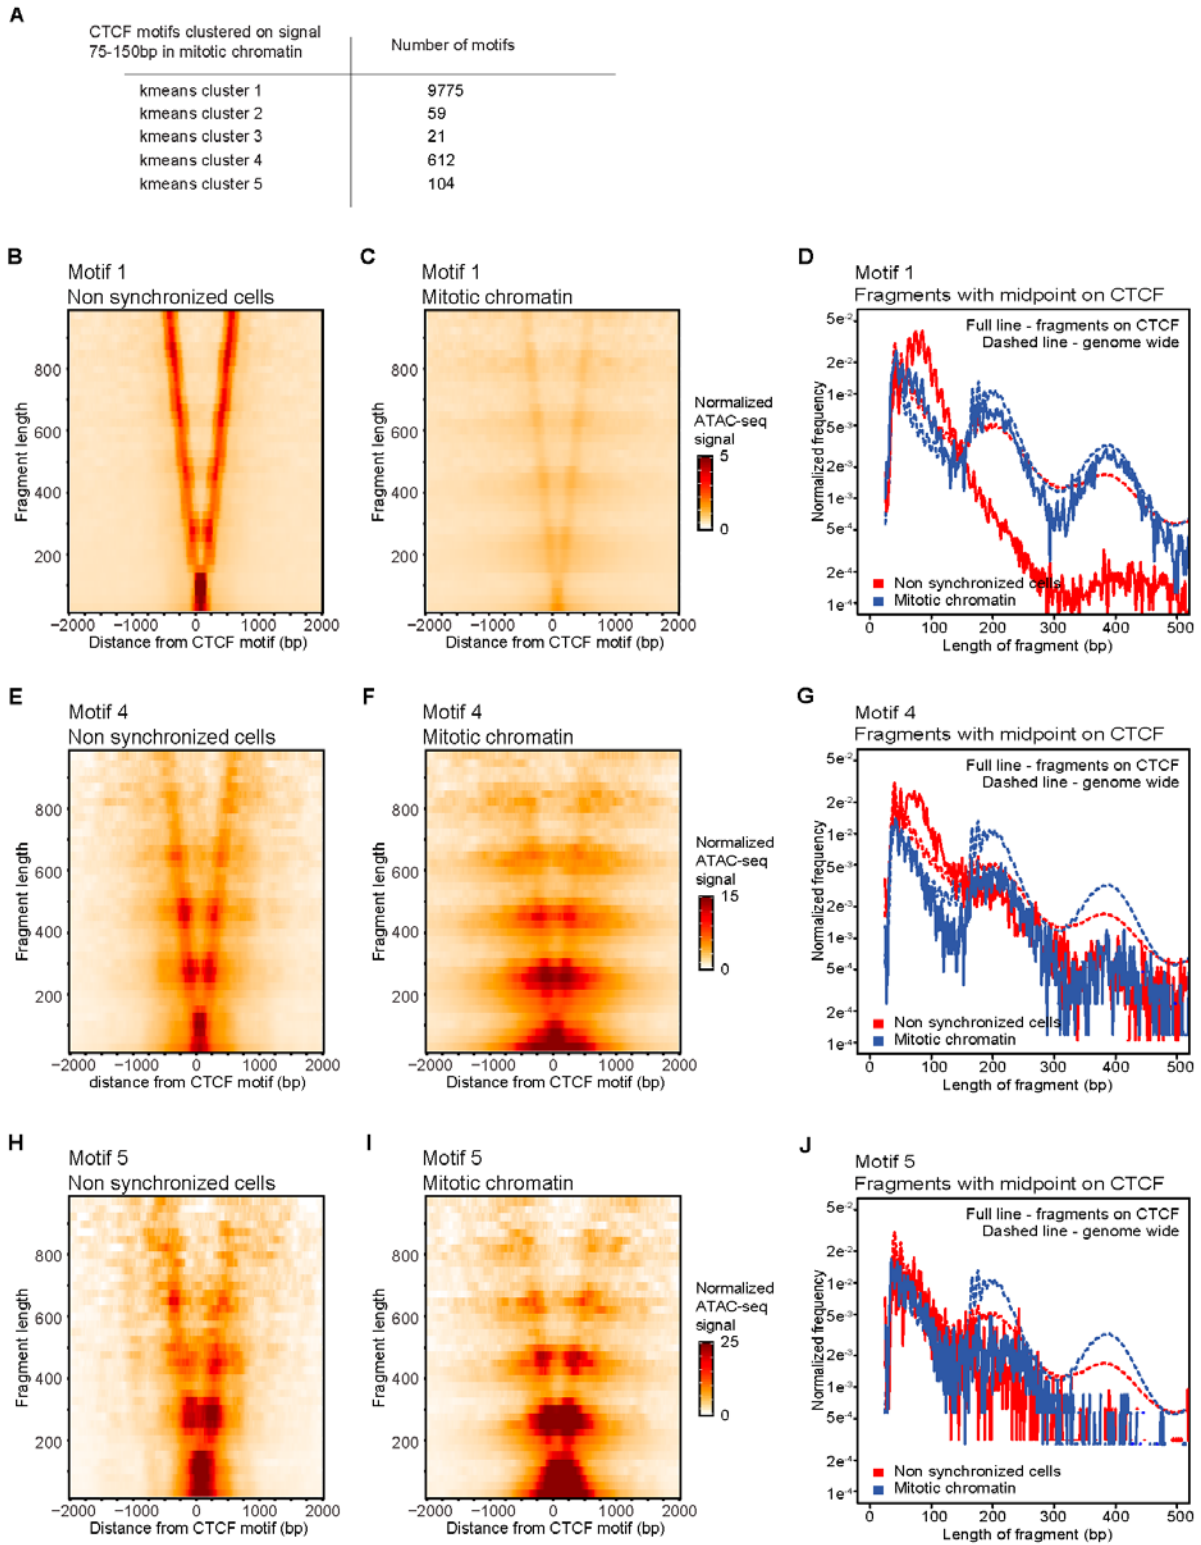



**Supplemental Fig. S4** – (A) K-means clustering in 5 clusters of ATAC-seq signal of 75-150 bp length reads in mitotic chromatin at 2kb window from interphase accessible CTCF motifs. (B-C) V-plots of ATAC-seq data obtained with non-synchronized cells (B) and mitotic chromatin (C) at CTCF motifs in cluster 1 representing 9,975 CTCF motifs. (D) Fragment length distribution of reads with their midpoint on a CTCF motif from cluster 1. (E-F) V-plots of ATAC-seq data obtained with non-synchronized cells (E) and mitotic chromatin (F) on CTCF motifs in cluster 4 of kmeans clustering representing 612 CTCF motifs. (G) Fragment length distribution of reads with their midpoint on a CTCF motif from cluster 4. (H-I) V-plots of ATAC-seq data obtained with non-synchronized cells (H) and mitotic chromatin (I) on CTCF motifs in cluster 5 of kmeans clustering representing 104 CTCF motifs. (J) Fragment length distribution of reads with their midpoint on a CTCF motif from cluster 5.

Supplemental Fig. S5

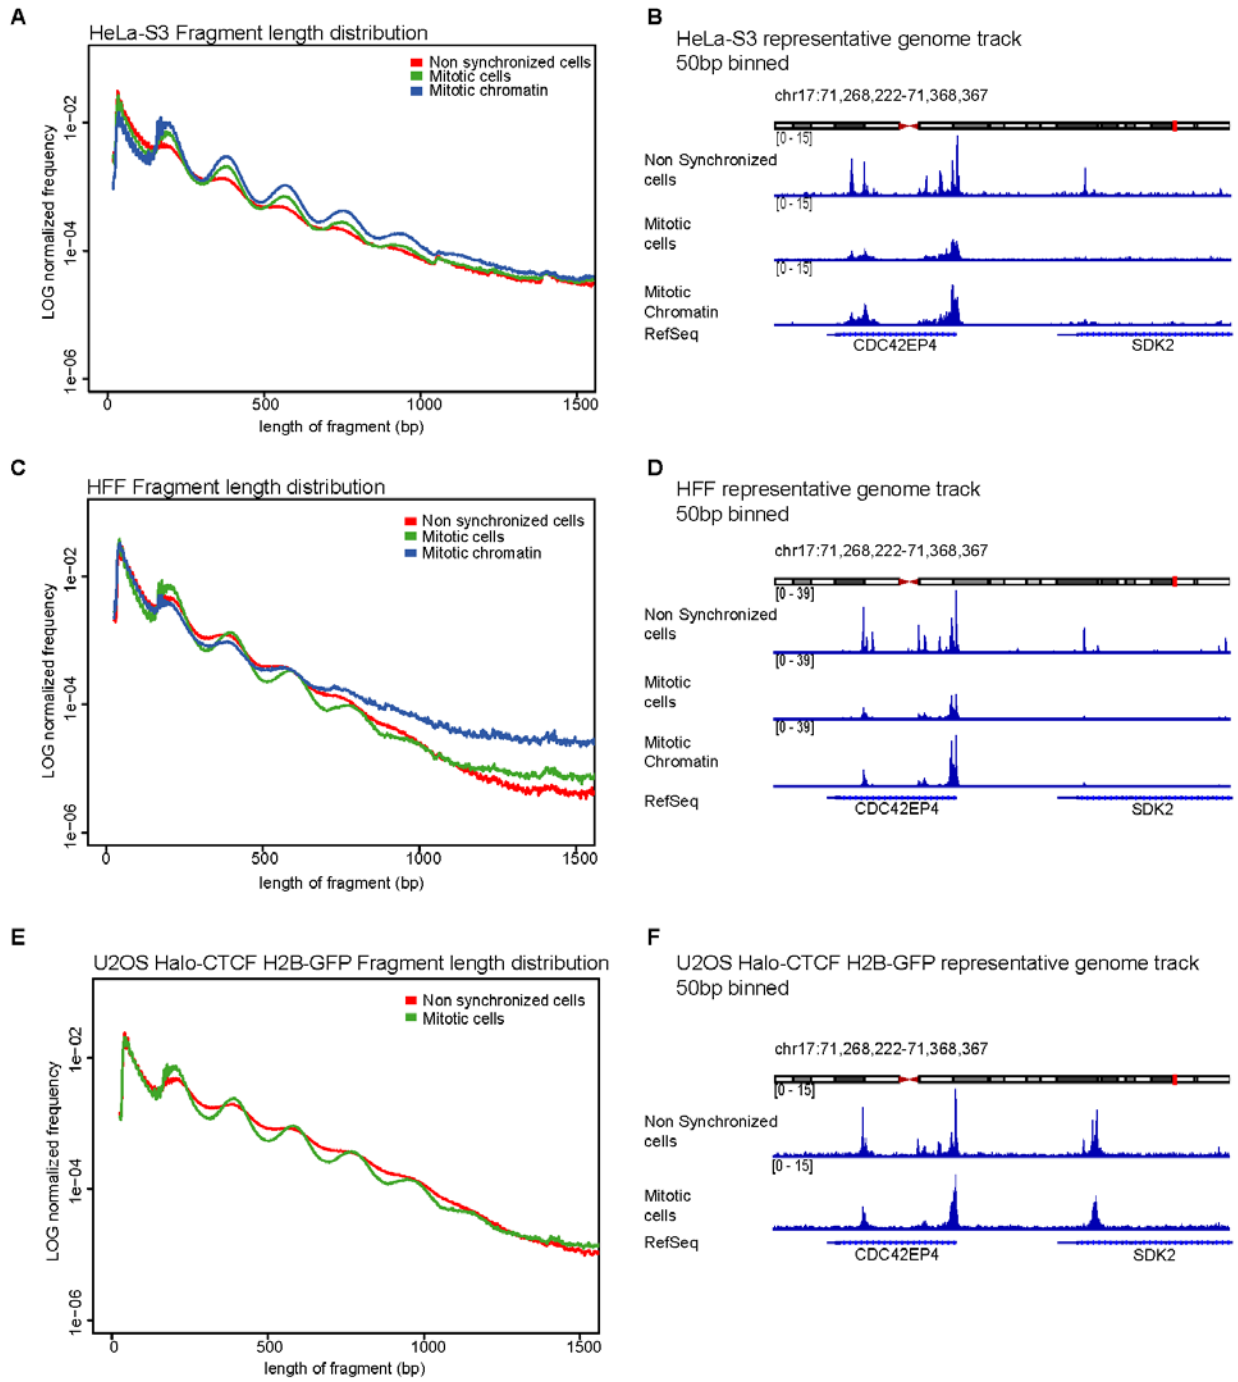

**Supplemental Fig. S5** – ATAC-seq fragment length distributions and representative genome tracks for data obtained with HeLa-S3 (A-B), HFF (C-D) and U2OS Halo-CTCF H2B-GFP (E-F).

Supplemental Fig. S6

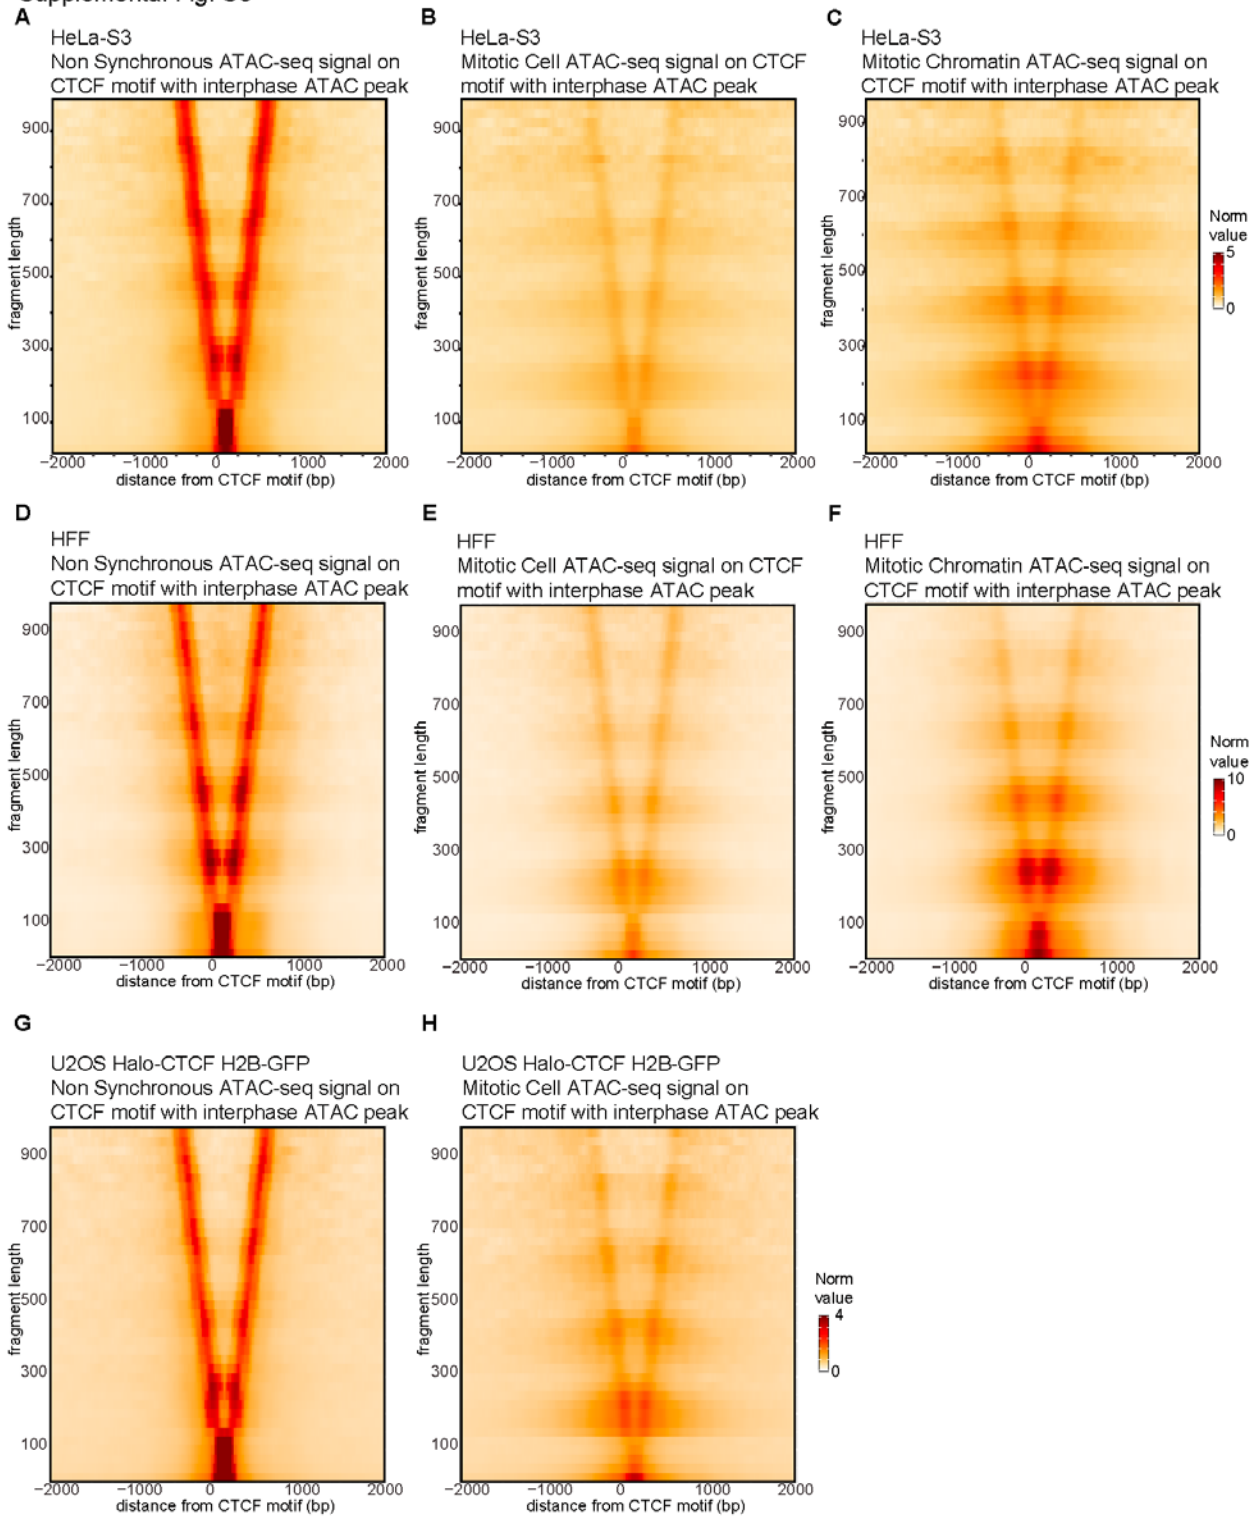

**Supplemental Fig. S6** – Normalized V-plots of ATAC-seq data obtained with HeLa-S3 cells at CTCF motifs that display ATAC-seq peaks in interphase for non-synchronized cells (**A**), mitotic cells (**B**) and purified mitotic chromatin (**C**). Normalized V-plots of ATAC-seq data obtained with HFF cells at CTCF sites that display ATAC-seq peaks in interphase for non-synchronized cells (**D**), mitotic cells (**E**) and purified mitotic chromatin (**F**). Normalized V-plots of ATAC-seq data obtained with U2OS Halo-CTCF H2B-GFP cells at CTCF sites that display ATAC-seq peaks in interphase for non-synchronized cells (**A**), mitotic cells (**B**) and purified mitotic chromatin (**C**)

Supplemental Fig. S7

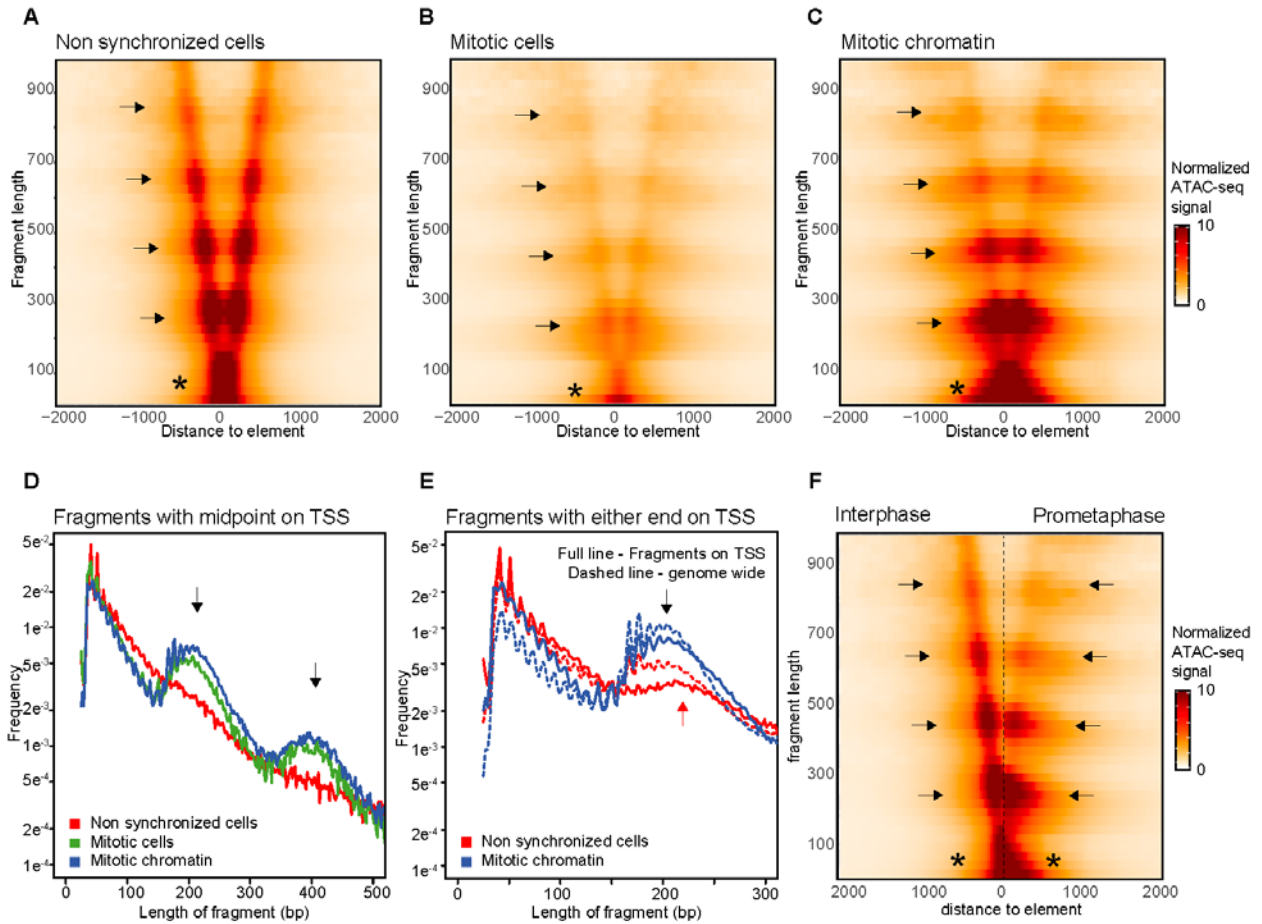

**Supplemental Fig. S7** – ATAC-seq data obtained with HeLa-S3 in non-synchronized cells (A), mitotic cells (B), and purified mitotic chromatin (C) represented as V-plots aggregated on all TSS that display an ATAC-seq peak in interphase. (D) Fragment length distribution of non-synchronized cells, mitotic cells and mitotic chromatin for all reads with their midpoint on any TSS. (E) Fragment length distribution of non-synchronized cells and mitotic chromatin for all reads with either end near any TSS compared to the genome-wide distribution (dashed line). (F) Side-to-side comparison of V-plots for non-synchronized cells and mitotic chromatin up to 2 kb upstream of TSS.

Supplemental Fig. S8

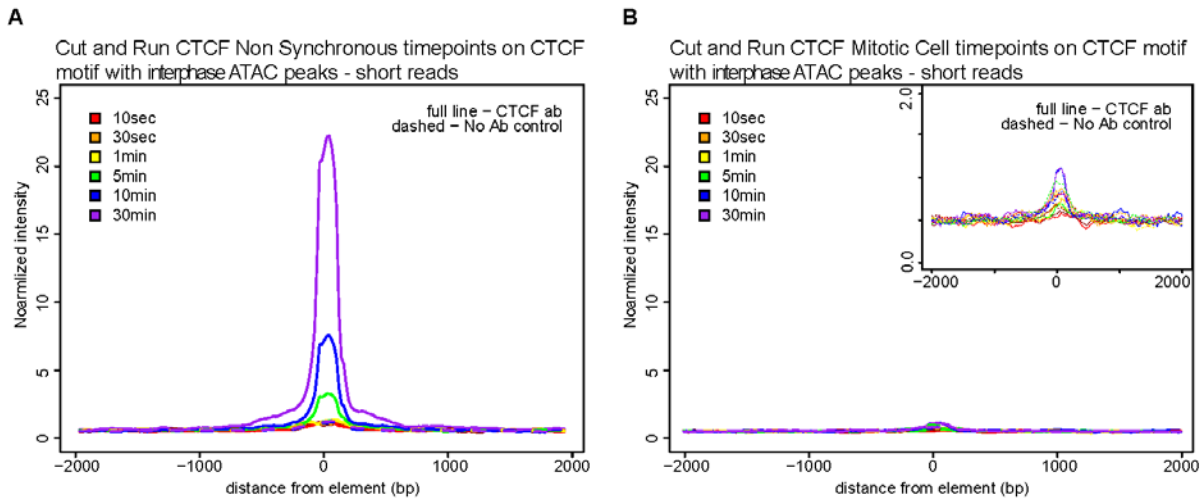

**Supplemental Fig. S8** – Aggregation plots of CTCF CUT&RUN signal for reads shorter than 120bp obtained with different digestion times with pA-MNase (10 seconds to 30 min). Data are aggregated at CTCF motifs that display ATAC-seq peaks in interphase for HeLa-S3 non-synchronized cells (**A**) and mitotic cells (**B**). Insert in **B** shows CUT&RUN signal of mitotic cells at a y-axis from (0-2).

Supplemental Fig. S9

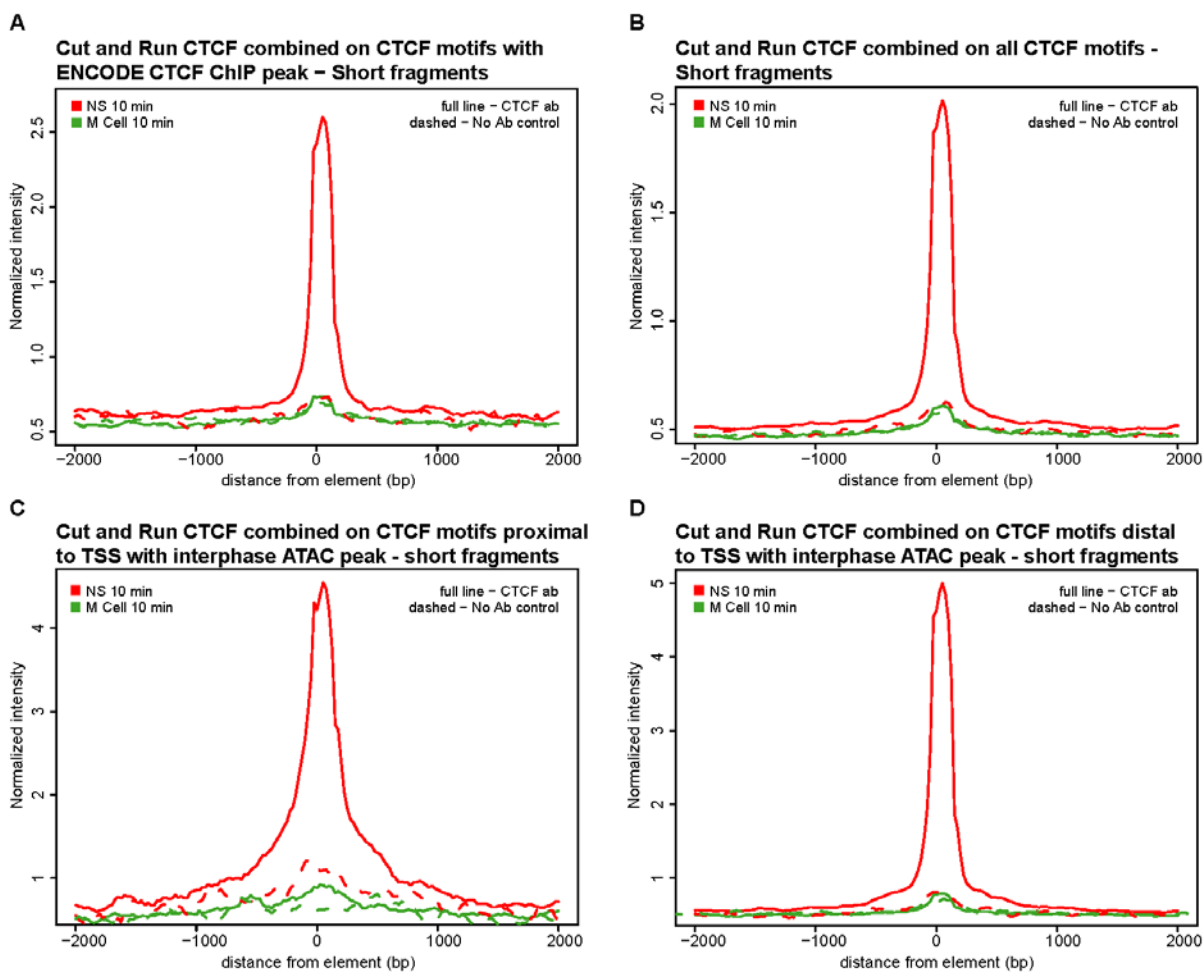

**Supplemental Fig. S9** – (A) CTCF CUT&RUN signal obtained with non-synchronized and mitotic HeLa-S3 cells for reads shorter than 120bp aggregated at all CTCF motifs that display ENCODE CTCF ChIP peaks (6,893 sites). (B) CTCF CUT&RUN signal obtained with non-synchronized and mitotic HeLa-S3 cells for reads shorter than 120bp on all CTCF motifs (42,066 sites). (C) CTCF CUT&RUN signal obtained with non-synchronized and mitotic HeLa-S3 cells for reads shorter than 120bp on all CTCF motifs that display an ATAC-seq peak within 2 kb to a TSS in interphase (1,181 peaks). (D) CTCF CUT&RUN signal obtained non-synchronized and mitotic HeLa-S3 cells for reads shorter than 120bp on all CTCF motifs that display an interphase ATAC-seq peak further than 2 kb away from a TSS in interphase (9,459 peaks).

Supplemental Fig. S10

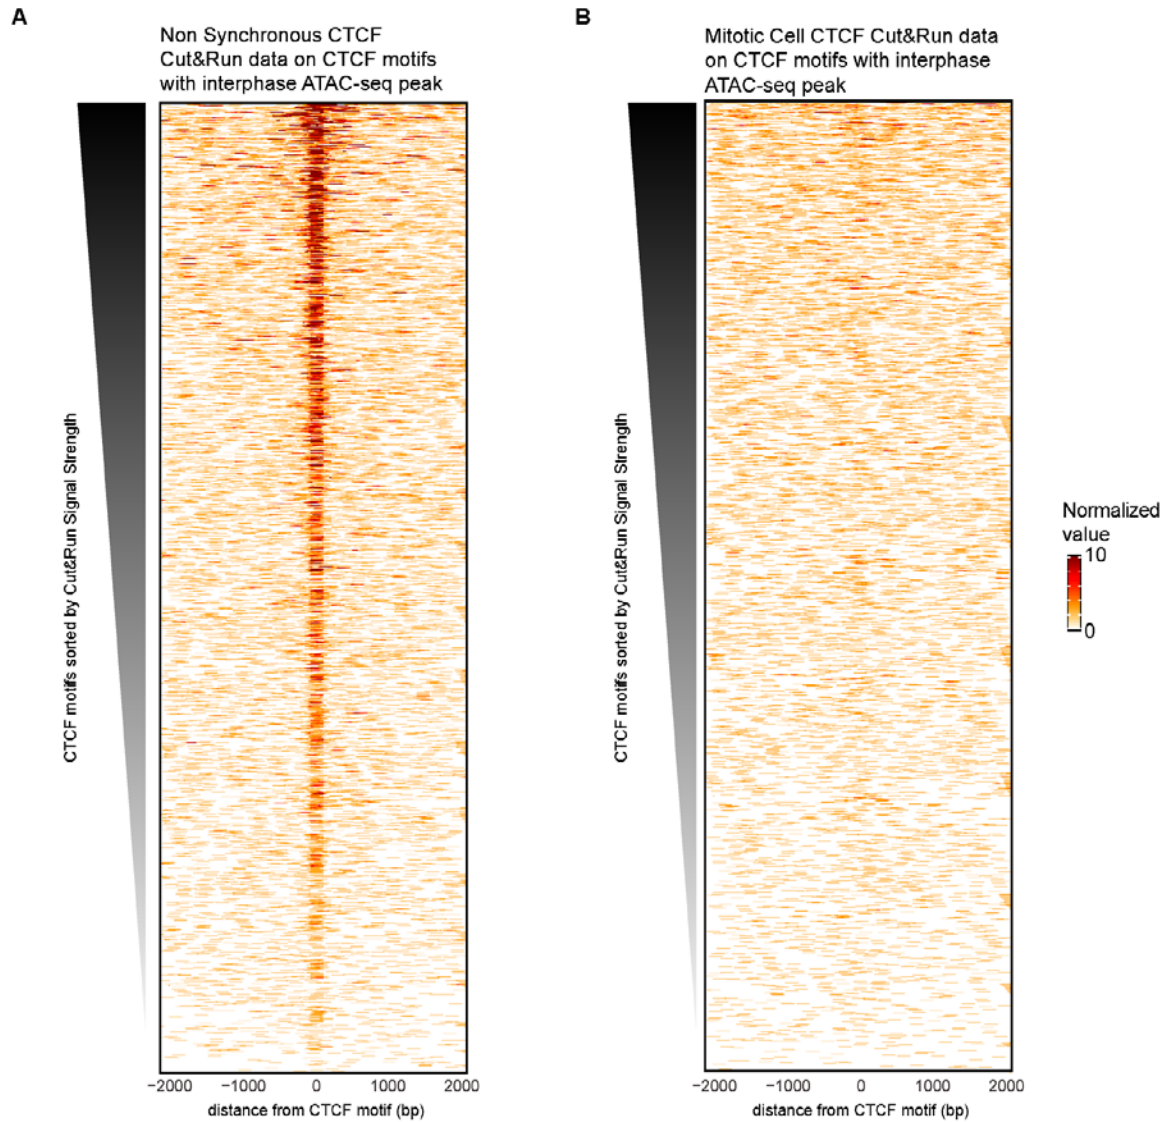

**Supplemental Fig. S10** – Aggregation of CUT&RUN data heatmap obtained with HeLa-S3 cells for all reads shorter than 120bp on CTCF motifs that display an ATAC-seq peak in interphase sorted on CUT&RUN signal strength in interphase for non-synchronized cell (**A**) and mitotic cells (**B**).



Supplemental Fig. S11

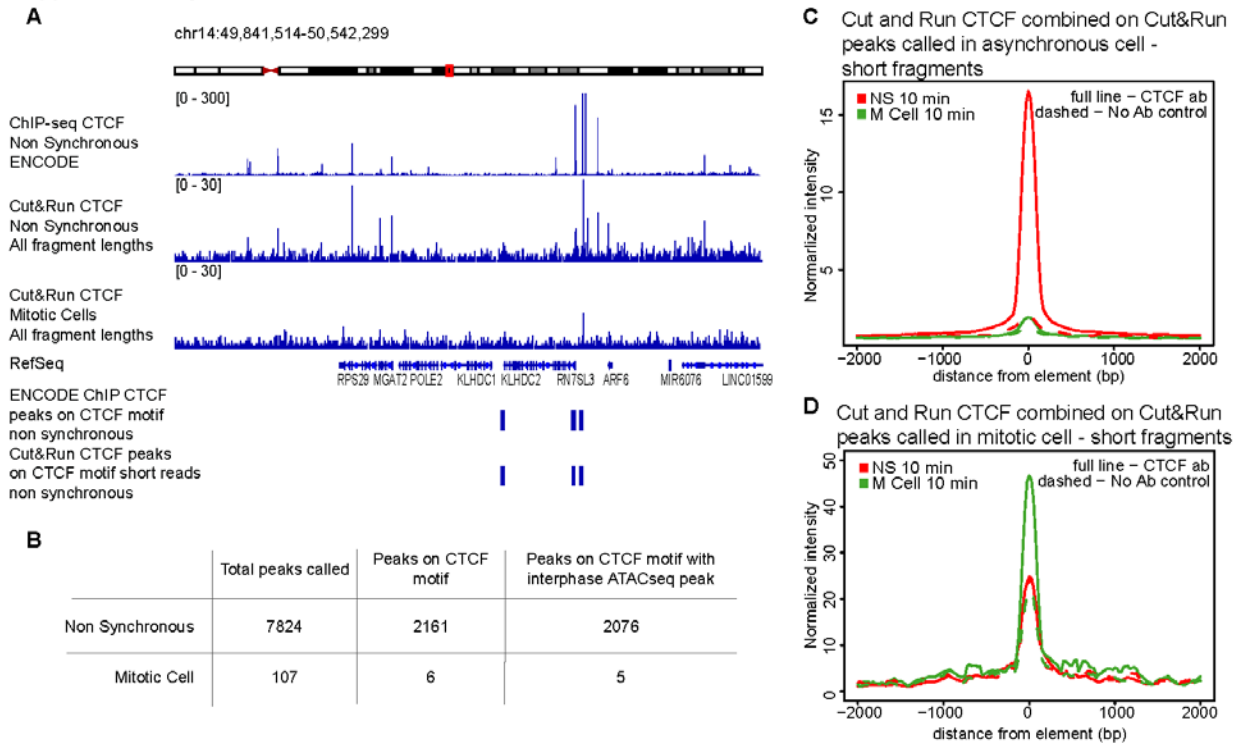

**Supplemental Fig. S11** – De novo peak calling on CUT&RUN CTCF data obtained with non-synchronized and mitotic HeLa-S3 cells. **(A)** Visualization of ENCODE non synchronized CTCF ChIP-seq data and CUT&RUN data obtained with non-synchronized and mitotic HeLa-S3 cells for a representative region. The lower two tracks show the locations of CTCF motifs that display peaks called on ChIP-seq and CUT&RUN data respectively (CTCF motifs were stretched to 2kb to enhance visualization). **(B)** Number of peaks called on CTCF CUT&RUN data obtained with non-synchronized and mitotic HeLa-S3 cells and their overlap with CTCF motifs and ATAC-seq peaks. **(C)** CTCF CUT&RUN signal in non-synchronized and mitotic cells for reads shorter than 120bp on all peaks called in non-synchronized cells (7,824 peaks). **(D)** CTCF CUT&RUN signal in non-synchronized and mitotic cells for reads shorter than 120bp on all peaks called in mitotic cells (107 peaks).

Supplemental Fig. S12

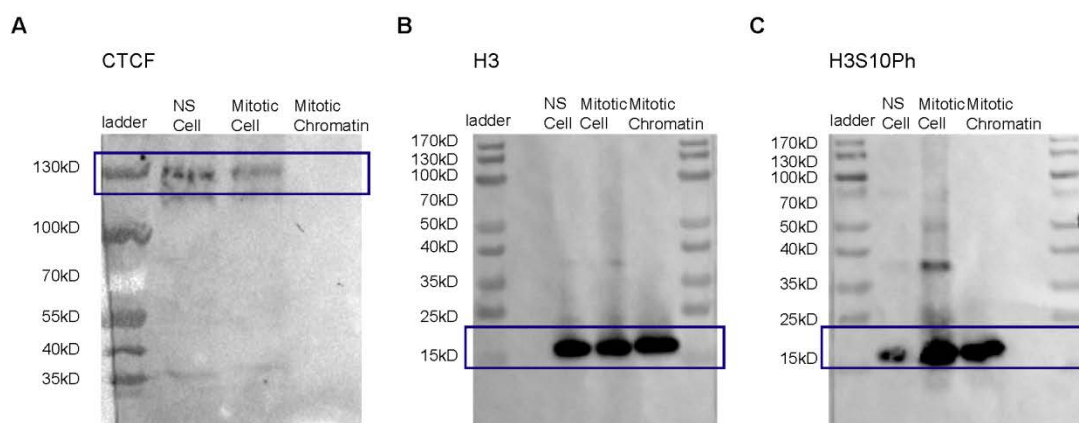

**Supplemental Fig. S12** – Western blots of lysates from non-synchronized HeLa-S3 cells, mitotic HeLa-S3 cells and mitotic chromatin purified from mitotic HeLa-S3 cells probed with antibodies detecting CTCF (A), H3 (B) and H3S10ph (C).

Supplemental Fig. S13

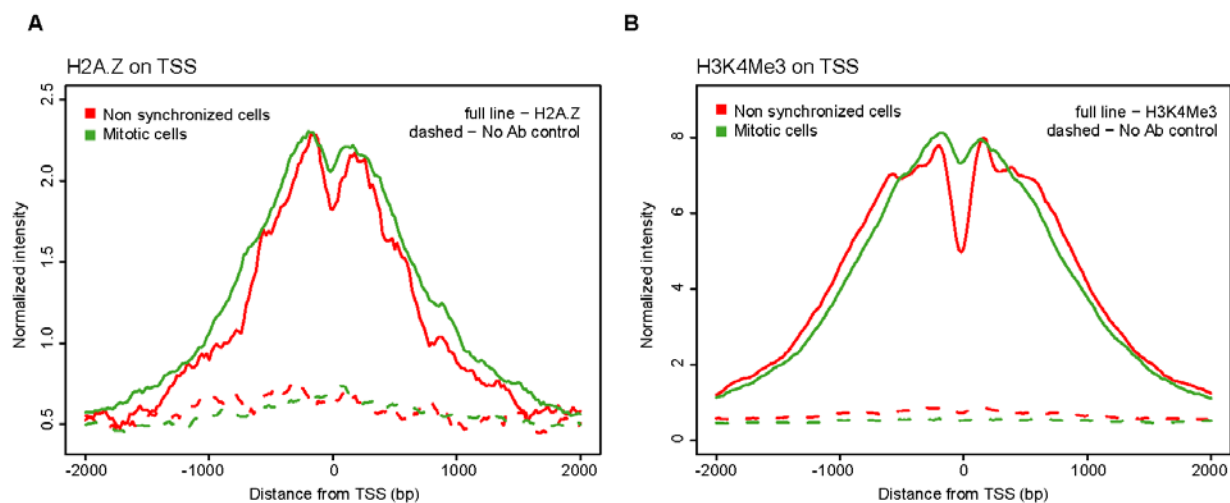

**Supplemental Fig. S13** – (A) H2A.Z CUT&RUN signal of fragments larger than 120bp on TSSs that display ATAC-seq peaks in interphase for non-synchronized HeLa-S3 cells (red) and mitotic HeLa-S3 cells (green). (B) H3K4Me3 CUT&RUN signal of fragments larger than 120bp on TSSs that display ATAC-seq peaks in interphase for non-synchronized HeLa-S3 cells (red) and mitotic HeLa-S3 cells (green).

Supplemental Fig. S14

**A**

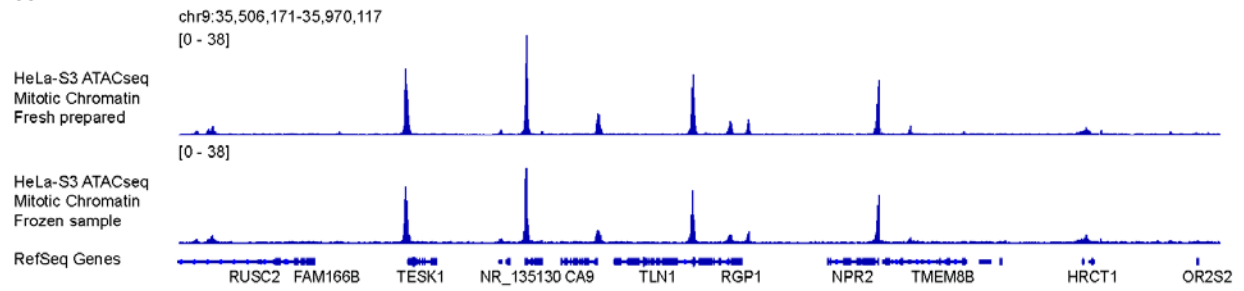

**B**

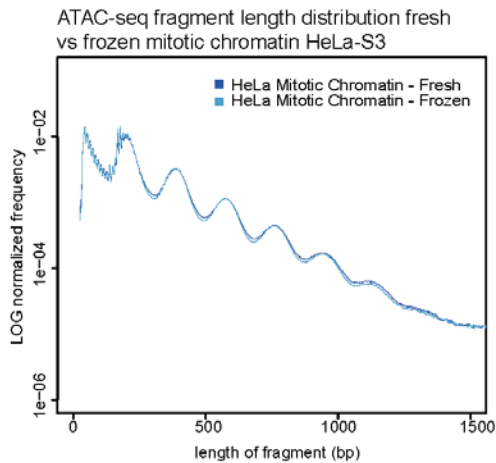

**C**

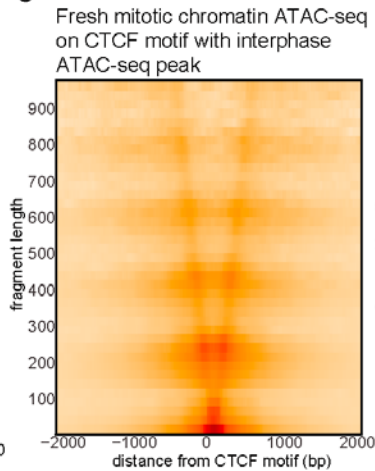

**D**

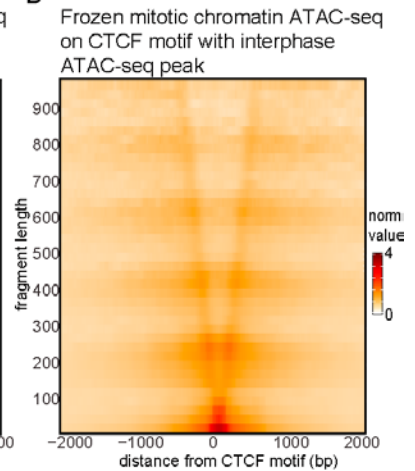

**Supplemental Fig. S14** – Comparison of ATAC-seq data with freshly prepared and frozen stored mitotic chromatin from mitotically synchronized HeLa-S3. **(A)** representative genomic tracks, **(B)** fragment length distribution, **(C-D)** V-plots at CTCF motifs that display ATAC-seq peaks in interphase **(C-D)**.

Supplemental Fig. S15

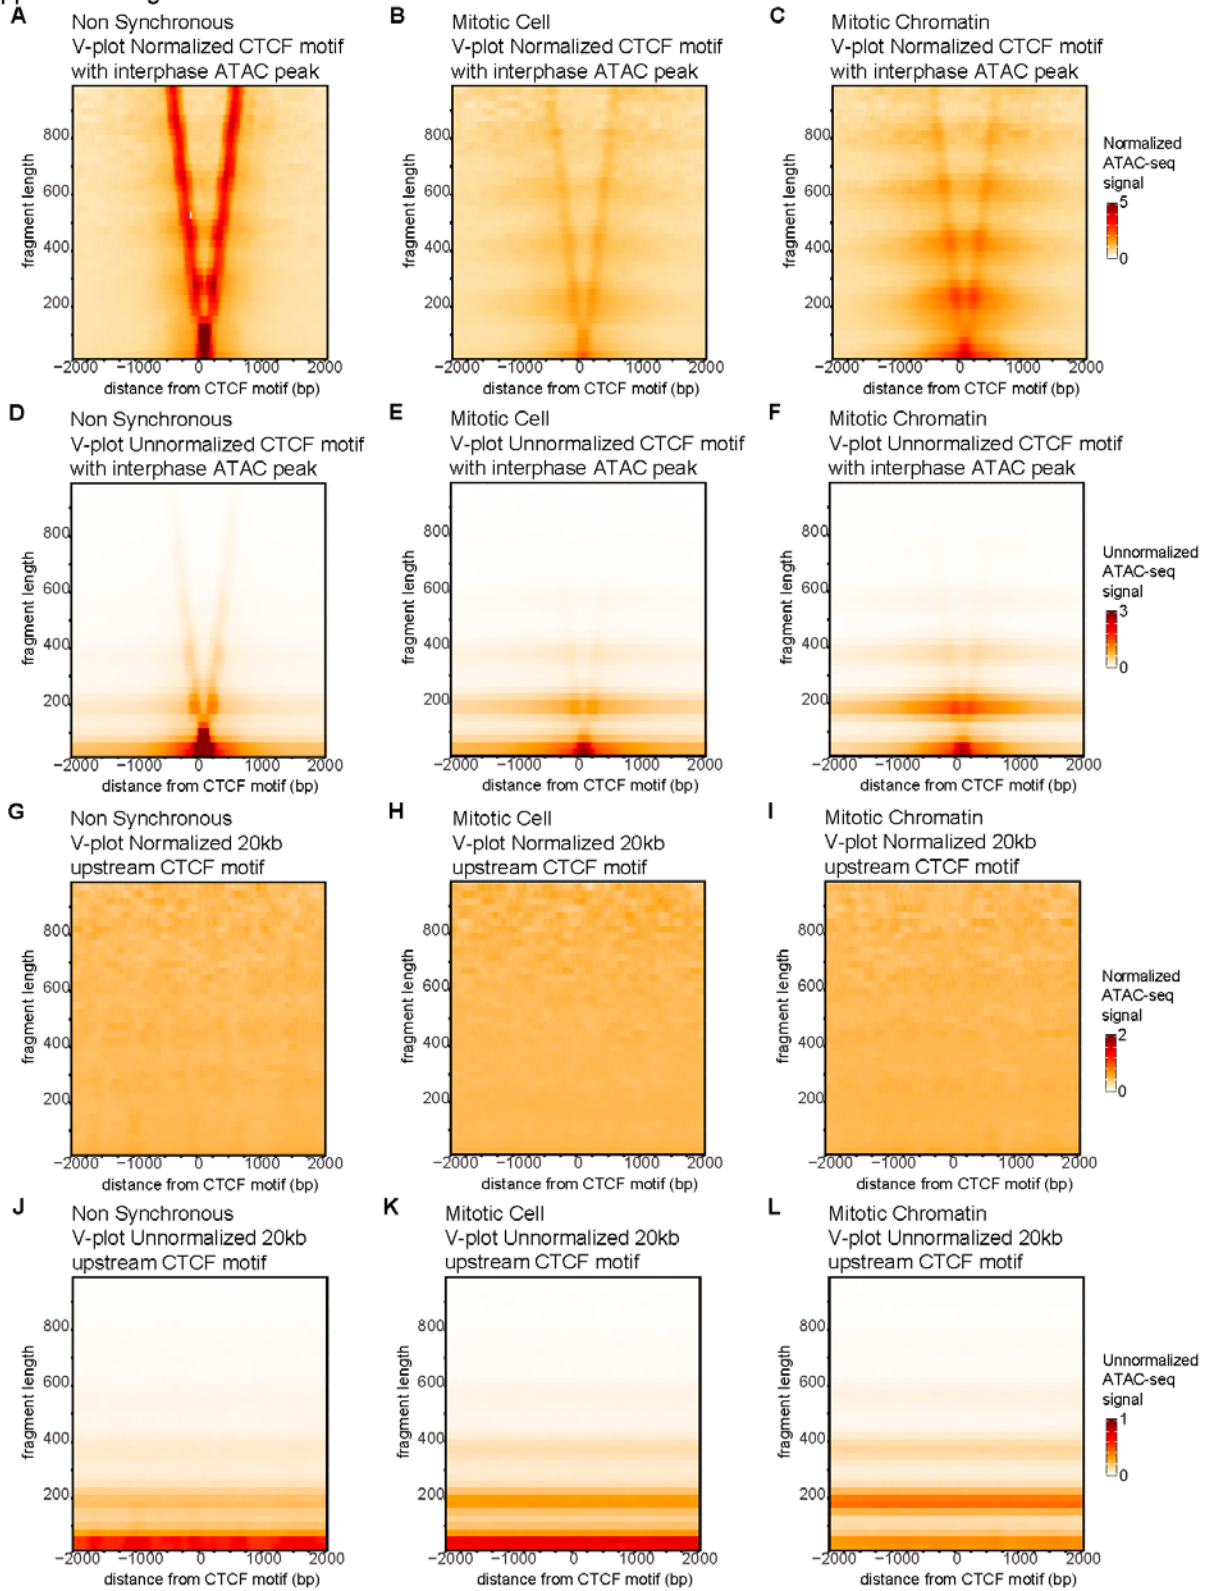

**Supplemental Fig. S15** - V-plots normalized (**A-C**) and unnormalized (**D-F**) by the genome-wide fragment length distribution for HeLa-S3 ATAC-seq signal on all CTCF motifs that display an ATAC-seq peak in interphase for non-synchronized cells (**A/D**), mitotic cells (**B/E**) and purified mitotic chromatin (**C/F**). V-plots normalized (**G-I**) and unnormalized (**J-L**) by the genome-wide fragment length distribution for HeLa-S3 ATAC-seq signal on a region 20kb upstream of every CTCF motifs representing a random region in non-synchronized cells (**G/J**), mitotic cells (**H/K**) and purified mitotic chromatin (**I/L**).

## Supplemental tables

Supplemental Table T1 – 5C mapping statistics

|          |                 | Reads Sequenced | Valid reads mapped |
|----------|-----------------|-----------------|--------------------|
| R1       | Asynchronous    | 100,986,155     | 99,609,624         |
|          | Mitotic Cell    | 67,042,262      | 65,620,645         |
|          | Mitotic Cluster | 38,212,480      | 36,918,691         |
| R2       | Asynchronous    | 181,209,251     | 175,402,702        |
|          | Mitotic Cell    | 181,966,242     | 175,402,702        |
|          | Mitotic Cluster | 173,399,970     | 166,197,088        |
| Combined | Asynchronous    | 282,195,406     | 275,012,326        |
|          | Mitotic Cell    | 249,008,504     | 240,312,381        |
|          | Mitotic Cluster | 211,612,450     | 203,115,779        |

Supplemental Table T2 – Antibodies used for western blot and Cut&Run

|         | Company + catalogue number | Western blot concentration | Cut&Run concentration |
|---------|----------------------------|----------------------------|-----------------------|
| CTCF    | CST #2899                  | 1:1000                     | 1:100                 |
| H2A.Z   | Abcam #ab4174              | x                          | 1:100                 |
| H3K4Me1 | Abcam #ab8895              | x                          | 1:50                  |
| H3K4Me3 | Abcam #ab8580              | x                          | 1:100                 |
| H3      | Abcam #ab1791              | 1:1000                     | x                     |
| H3S10Ph | Abcam #ab5176              | 1:1000                     | x                     |

## Supplemental Movies

Supplemental Movie S1 – Live cell imaging halo-CTCF overlaid with brightfield

Supplemental Movie S2 – Live cell imaging H2B-GFP on left and halo-CTCF on right

Supplemental Movie S3 – Single particle tracking Halo-CTCF in interphase cells

Supplemental Movie S4 - Single particle tracking Halo-CTCF in nocodazole arrested mitotic cells

Supplemental Movie S5 - Single particle tracking Halo-CTCF in “enriched” prometaphase cells
